# Supplementary material for: Fabrication of yolk–shell Pd@ZIF-8 nanoparticles with excellent catalytic size-selectivity for the hydrogenation of olefins
Source: Royal Society of Chemistry journal article supplement (doi:10.1039/c5ce02219c), 2016-01-01
Supplement: c5ce02219c1.pdf [file c5ce02219c1.pdf]

## **Electronic Supplementary Information**

### **Fabrication of yolk-shell Pd@ZIF-8 nanoparticles and their excellent catalytic size-selectivity in the hydrogenation of olefins**

Fei-Long Li,<sup>a</sup> Hong-Xi Li<sup>\*,a</sup> and Jian-Ping Lang<sup>\*,a,b</sup>

<sup>a</sup> College of Chemistry, Chemical Engineering and Materials Science, Soochow University,  
Suzhou 215123, P. R. China

<sup>b</sup> State Key Laboratory of Organometallic Chemistry, Shanghai Institute of Organic Chemistry,  
Chinese Academy of Sciences, Shanghai 210032, P. R. China

## Table of Contents

|                                                                                                                                                                                                         |           |
|---------------------------------------------------------------------------------------------------------------------------------------------------------------------------------------------------------|-----------|
| <b>Table S1.</b> The ICP data for the Zn and Pd contents in Pd@ZnO and Pd@ZIF-8 NPs. ....                                                                                                               | S3        |
| <b>Fig. S1</b> The TEM images of (a) ZnO nanospheres and (b) hollow ZIF-8 NPs. ....                                                                                                                     | S3        |
| <b>Fig. S2</b> The TEM images of (a) ZnO nanospheres and (b) hollow ZIF-8 NPs. ....                                                                                                                     | S3        |
| <b>Fig. S3</b> The corresponding histogram of size distribution. In the histogram, the particle size was an average of the edge lengths measured along two orthogonal directions of each nanocube. .... | S3        |
| <b>Fig. S4</b> The TGA curve of the yolk-shell Pd@ZIF-8 nanocomposites. ....                                                                                                                            | S4        |
| <b>Fig. S5</b> Recycling of the yolk-shell Pd@ZIF-8 composites for the hydrogenation of 1-hexene. ....                                                                                                  | S4        |
| <b>Fig. S6</b> The TEM images of yolk-shell nanostructure (a) before catalytic reaction and (b) after the third circle hydrogenation reaction. ....                                                     | S5        |
| <b>Fig. S7</b> The PXRD patterns of yolk-shell Pd@ZIF-8 composites before catalytic reaction (dark line) and after the third hydrogenation reaction (blue line). ....                                   | S5        |
| <b>Preparation of Au nanorods, Au@ZnO nanospheres and yolk-shell Au@ZIF-8 NPs. ....</b>                                                                                                                 | <b>S6</b> |
| <b>Fig. S8</b> The TEM images of (a) Au@ZnO nanospheres and (b) yolk-shell Au@ZIF-8 NPs. ....                                                                                                           | S6        |

**Table S1** The ICP data for the Zn and Pd contents in Pd@ZnO and Pd@ZIF-8 NPs.

| Sample   | Zn (wt%) | Pd (wt%) |
|----------|----------|----------|
| Pd@ZnO   | 37.6     | 3.73     |
| Pd@ZIF-8 | 26.9     | 3.42     |

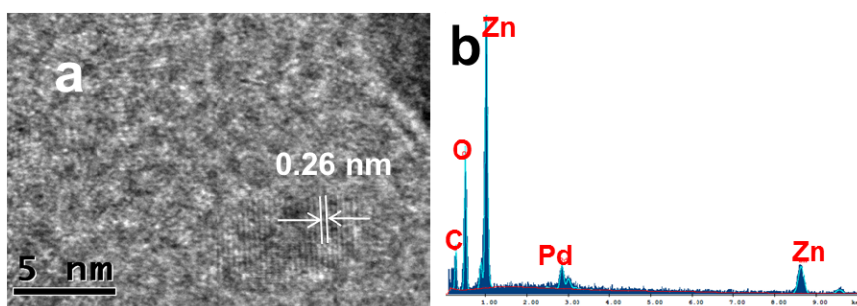

**Fig. S1** (a) The HRTEM image and (b) the EDS spectrum of Pd@ZnO NPs.

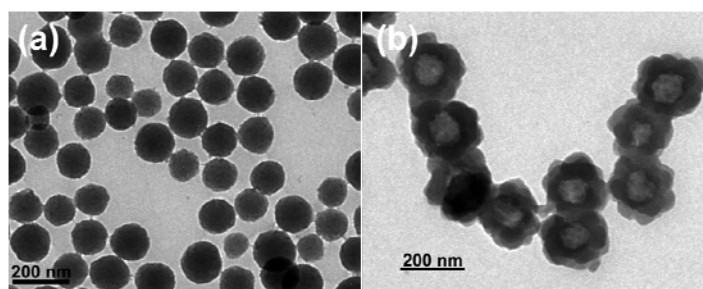

**Fig. S2** The TEM images of (a) ZnO spheres and (b) hollow ZIF-8 NPs.

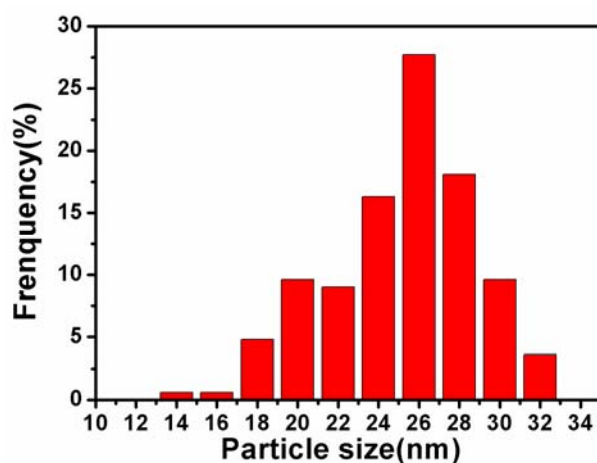

**Fig. S3** The corresponding histogram of size distribution. In the histogram, the particle size was an average of the edge lengths measured along two orthogonal directions of each nanocube.

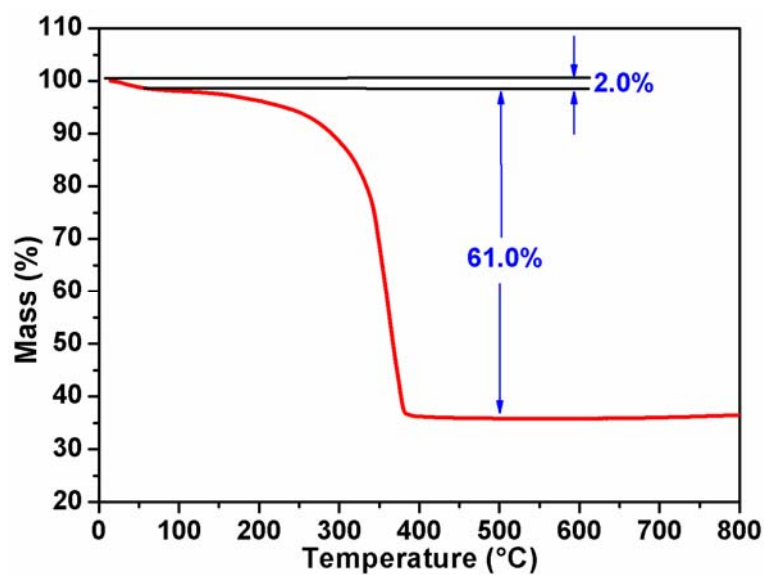

**Fig. S4** The TGA curve of the yolk-shell Pd@ZIF-8 nanocomposites.

**Notes:** For the TGA curve, the weight loss of about 2.0 % is due to the removal of the guest molecules, followed by a distinct weight loss caused by the combustion of carbon. The remaining weight of the composites after heating to 400 °C is about 37.0 %, corresponding to the calculated value by using the ICP data from the following equation:  $m(\text{residue}) = 3.42 \text{ wt.}\% \times M(\text{PdO})/M(\text{Pd}) + 26.9 \text{ wt.}\% \times M(\text{ZnO})/M(\text{Zn}) = 3.42 \text{ wt.}\% \times 122.4/106.4 + 26.9 \text{ wt.}\% \times 81.4/65.4 \approx 37.4 \text{ wt.}\%$

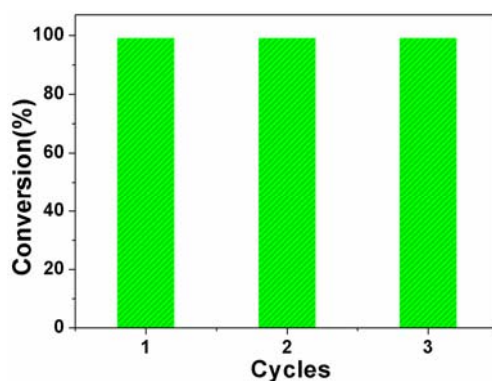

**Fig. S5** Recycling of the yolk-shell Pd@ZIF-8 composites for the hydrogenation of 1-hexene.

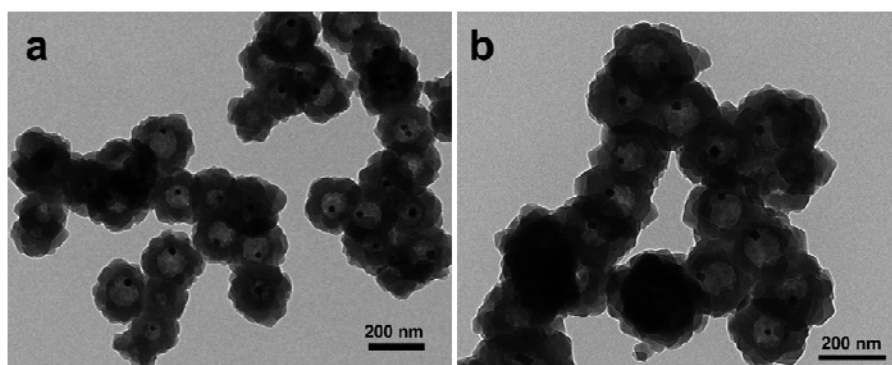

**Fig. S6** The TEM images of yolk-shell nanostructure (a) before catalytic reaction and (b) after the third cycle hydrogenation reaction.

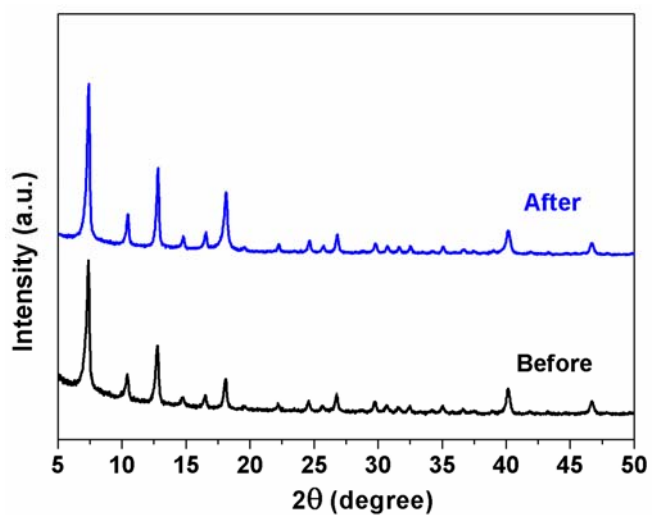

**Fig. S7** The PXRD patterns of yolk-shell Pd@ZIF-8 composites before catalytic reaction (dark line) and after the third hydrogenation reaction (blue line).

### Preparation of Au nanorods

For the seed solution: To an aqueous CTAB solution (0.2 mol/L, 5 mL) was added the  $\text{HAuCl}_4$  solution (0.5 mmol/L, 5 mL) and then the ice-cold  $\text{NaBH}_4$  solution (10 mmol/L, 0.6 mL). The color of the seed solution turned from yellow to brownish. The growth solution was prepared by adding CTAB (0.2 mol/L, 25 mL) to  $\text{AgNO}_3$  solution (4 mmol/L, 1.0 mL) mixed with  $\text{HAuCl}_4$  solution (1 mmol/L, 25 mL). The solution of AA (0.0788 mol/L, 0.35 mL) was then added to the mixture accompanied by a color change from yellow to colorless. Subsequently, the 60  $\mu\text{L}$  seed solution was added to the growth solution. The reaction was left to proceed for 12 h at 30 °C. The dark-blue color of the mixture indicated the formation of the Au nanorods (NRs), and this solution was stored at room temperature for next use without any purification.

### Preparation of Au@ZnO nanospheres

To the solution (50 mL) of CTAB (0.5 mmol) and AA (0.3 mmol) was added  $\text{Zn}(\text{NO}_3)_2 \cdot 6\text{H}_2\text{O}$  (0.6 mmol) and HMTA (0.6 mmol). Then the 50 mL solution of the preformed Au nanorods was added dropwise and stirred for 10 min. The mixture was heated at 85 °C for 8 h and then gradually cooled to room temperature. The pink product was centrifuged, washed with distilled water and absolute ethanol three times respectively, and dried in a vacuum at 60 °C for 12 h to yield Au@ZnO core-shell nanospheres.

### Preparation of yolk-shell Au@ZIF-8 nanostructures

Au@ZnO nanospheres (0.02 g) were fully dispersed in 30 mL methanol solution by ultrasonic. To this solution was added dropwise 10 mL of the aqueous solution of 2-methylimidazole (0.30 g). The mixture was shaken slightly for several seconds and was allowed to stand for about 1 h at room temperature. The resulting yolk-shell Au@ZIF-8 nanospheres were centrifuged, washed three times with ethanol and dried at 60 °C for 12 h.

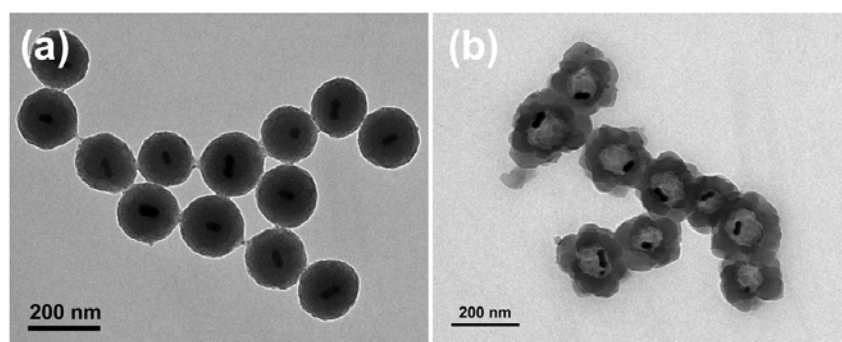

**Fig. S8** The TEM images of (a) Au@ZnO nanospheres and (b) yolk-shell Au@ZIF-8 NPs.
